# Supplementary material for: Sustained antigen release polyanhydride-based vaccine platform for immunization against bovine brucellosis
Source: PubMed Central journal article supplement — Heliyon. 2019 Aug 29;5(8):e02370. doi: 10.1016/j.heliyon.2019.e02370 (PMC6728543; doi:10.1016/j.heliyon.2019.e02370), 2019-08-29
Supplement: mmc3.pdf [file mmc3.pdf]

|                            | Naïve            | VPEAR                      | RB51                      |
|----------------------------|------------------|----------------------------|---------------------------|
| <b>Pre-boost</b>           |                  |                            |                           |
| Total area                 | 0.2334           | 0.2496                     | 0.3669                    |
| Std. Error                 | 0.04315          | 0.03814                    | 0.05716                   |
| 95% Confidence interval    | 0.1488 - 0.3179  | 0.1748 - 0.3243            | 0.2549 - 0.4789           |
| <b>2 weeks post-boost</b>  |                  |                            |                           |
| Total area                 | 0.188            | <b>1.214<sup>a</sup></b>   | <b>1.382<sup>a</sup></b>  |
| Std. Error                 | 0.06592          | 0.2951                     | 0.2081                    |
| 95% Confidence interval    | 0.05876 - 0.3172 | 0.6352 - 1.792             | 0.9737 - 1.789            |
| <b>8 weeks post-boost</b>  |                  |                            |                           |
| Total area                 | 0.2963           | <b>2.453<sup>a,b</sup></b> | <b>1.20<sup>a</sup></b>   |
| Std. Error                 | 0.1552           | 0.4758                     | 0.2219                    |
| 95% Confidence interval    | 0 - 0.6006       | 1.521 - 3.386              | 0.7646 - 1.635            |
| <b>12 weeks post-boost</b> |                  |                            |                           |
| Total area                 | 0.1377           | <b>1.367<sup>a</sup></b>   | <b>0.8444<sup>a</sup></b> |
| Std. Error                 | 0.006129         | 0.4796                     | 0.2964                    |
| 95% Confidence interval    | 0.1257 - 0.1497  | 0.4268 - 2.307             | 0.2634 - 1.425            |
