# Supplementary figures and images for: Sustained antigen release polyanhydride-based vaccine platform for immunization against bovine brucellosis
Source: PubMed Central journal article supplement — Heliyon. 2019 Aug 29;5(8):e02370. doi: 10.1016/j.heliyon.2019.e02370 (PMC6728543; doi:10.1016/j.heliyon.2019.e02370), 2019-08-29

**A.**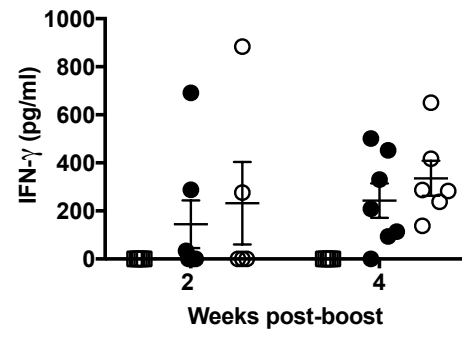**B.**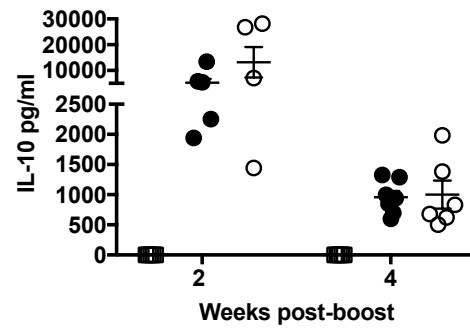**C.**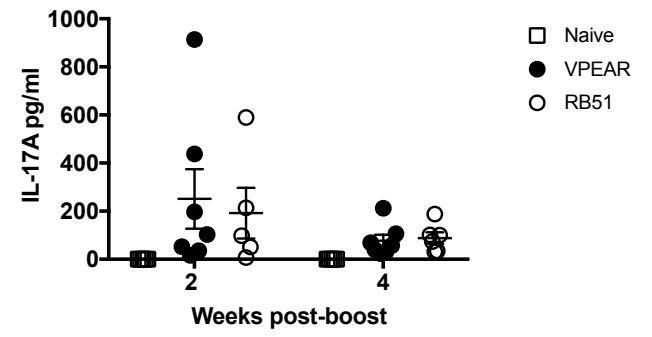

Supplement: mmc1.pdf [file mmc1.pdf]

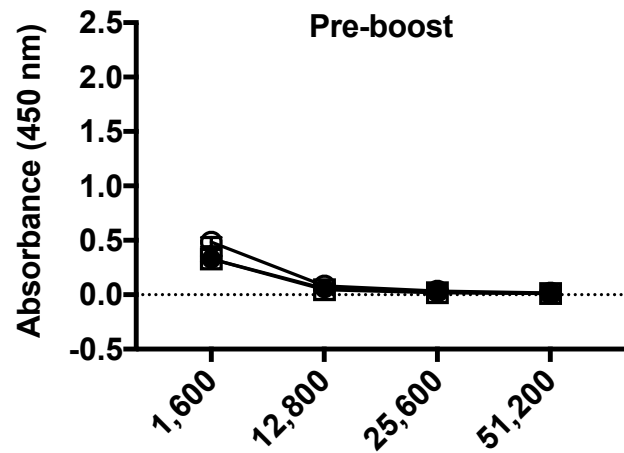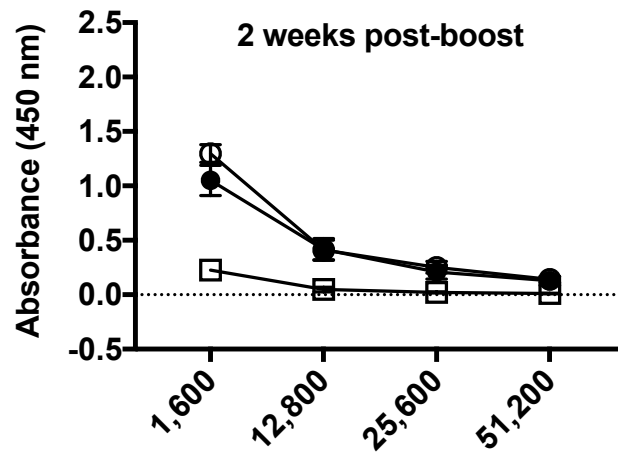

- Naive
- VPEAR
- RB51

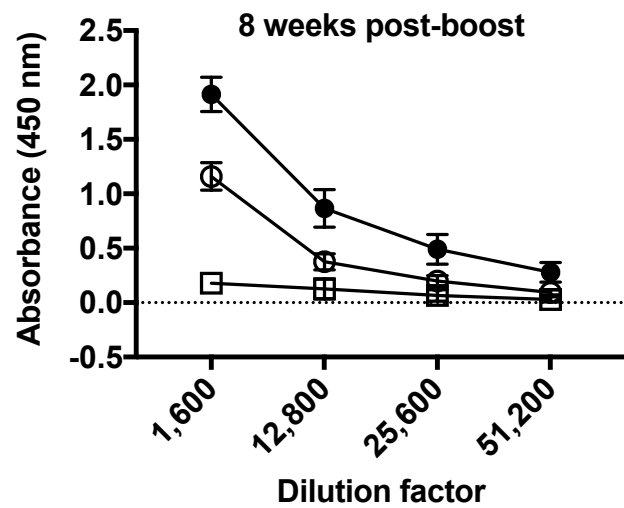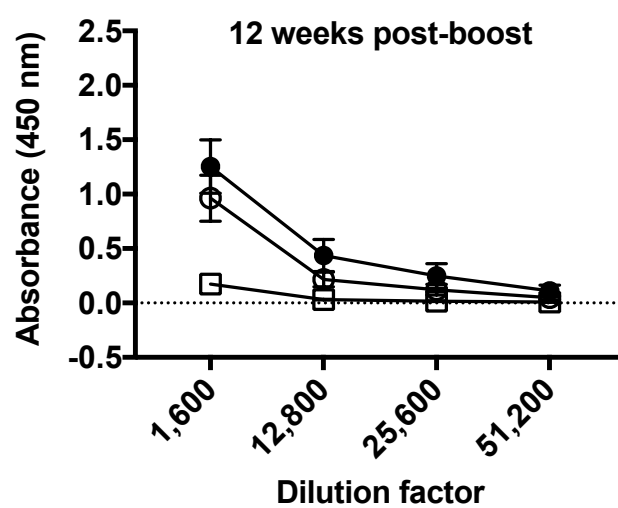

Supplement: mmc2.pdf [file mmc2.pdf]
